# Supplementary material for: One-Step Hydrothermal/Solvothermal Preparation of Pt/TiO2: An Efficient Catalyst for Biobutanol Oxidation at Room Temperature
Source: MDPI journal article supplement (doi:10.3390/molecules29071450), 2024-03-24
Supplement: s1 [file s1]

**One-step hydrothermal/solvothermal preparation of Pt/TiO<sub>2</sub>: an efficient catalyst for bio-butanol oxidation at room temperature**

Lijun Lei <sup>1,\*</sup>, Qianyue Cao <sup>2</sup> and Jiachen Ma <sup>1</sup>, Fengxiao Hou <sup>1</sup>

<sup>1</sup> School of Energy and Power Engineering, North University of China, Taiyuan 030051, China; leilijun@nuc.edu.cn (L.L.); neromjc@gmail.com (J.M.); mercatushou@outlook.com (F.H.)

<sup>2</sup> School of Chemistry and Chemical Engineering, North University of China, Taiyuan 030051, China; Caoqianyuedw@163.com (Q.C.)

\* Correspondence: leilijun@nuc.edu.cn (L.L.)

**Table S1.** ICP-OES results of Pt content for Pt-TiO<sub>2</sub> catalysts and supernatant.

| Entry           | Catalyst                          | Theoretical loading<br>(wt.%) | Actual loading<br>(wt.%) | Pt concentration<br>(mg/L) <sup>2</sup> |
|-----------------|-----------------------------------|-------------------------------|--------------------------|-----------------------------------------|
| 1               | Pt(1.1)-TiO <sub>2</sub>          | 1.0                           | 0.41                     | —                                       |
| 2               | Pt(2.6)-TiO <sub>2</sub>          | 1.0                           | 0.83                     | —                                       |
| 3               | Pt(3.6)-TiO <sub>2</sub>          | 1.0                           | 0.95                     | —                                       |
| 4               | Pt(5.3)-TiO <sub>2</sub>          | 1.0                           | 0.92                     | —                                       |
| 5               | Pt(8.7)-TiO <sub>2</sub>          | 1.0                           | 0.97                     | —                                       |
| 6               | Pt-SiO <sub>2</sub>               | 1.0                           | 0.90                     | —                                       |
| 7               | Pt-CeO <sub>2</sub>               | 1.0                           | 0.98                     | —                                       |
| 8               | Pt-ZrO <sub>2</sub>               | 1.0                           | 0.96                     | —                                       |
| 9               | Pt-Al <sub>2</sub> O <sub>3</sub> | 1.0                           | 0.94                     | —                                       |
| 10 <sup>1</sup> | Pt(3.6)-TiO <sub>2</sub>          | 1.0                           | 0.95                     | —                                       |
| 11 <sup>2</sup> | Pt(3.6)-TiO <sub>2</sub>          | —                             | 0.92                     | —                                       |
| 12              | Supernatant                       | —                             | —                        | Not detected                            |

<sup>1</sup> After 4 hours of butanol oxidation.

<sup>2</sup> After six cycles of butanol oxidation.

<sup>2</sup> Before conducting ICP-OES testing, the supernatant was diluted to 100 mL.

**Table S2.** Results of Pt 4f XPS spectra of Pt-TiO<sub>2</sub> catalysts.

| Entry | Catalyst                 | Pt <sup>0</sup> peak position |                   | Pt <sup>2+</sup> peak position |                   | Pt <sup>0</sup> fraction (%) |
|-------|--------------------------|-------------------------------|-------------------|--------------------------------|-------------------|------------------------------|
|       |                          | 4f <sub>7/2</sub>             | 4f <sub>5/2</sub> | 4f <sub>7/2</sub>              | 4f <sub>5/2</sub> |                              |
| 1     | Pt(1.1)-TiO <sub>2</sub> | 70.3                          | 73.7              | 71.5                           | 75.3              | 19                           |
| 2     | Pt(2.6)-TiO <sub>2</sub> | 70.4                          | 73.8              | 71.7                           | 75.0              | 33                           |
| 3     | Pt(3.6)-TiO <sub>2</sub> | 70.4                          | 73.8              | 71.5                           | 75.3              | 38                           |
| 4     | Pt(5.3)-TiO <sub>2</sub> | 70.4                          | 73.8              | 71.5                           | 75.3              | 48                           |
| 5     | Pt(8.7)-TiO <sub>2</sub> | 70.4                          | 73.7              | 71.4                           | 75.3              | 69                           |

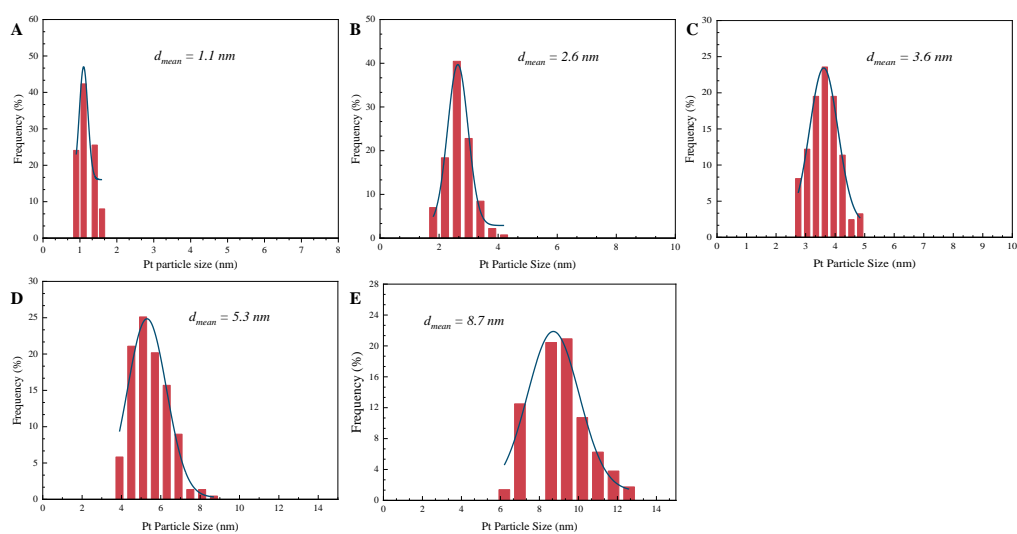

**Figure S1.** Pt particle size of series of Pd-TiO<sub>2</sub>, (A) Pt(1.1)-TiO<sub>2</sub>; (B) Pt(2.6)-TiO<sub>2</sub>; (C) Pt(3.6)-TiO<sub>2</sub>; (D) Pt(5.3)-TiO<sub>2</sub>; (E) Pt(8.7)-TiO<sub>2</sub>; (F) used Pt(3.6)-TiO<sub>2</sub>.

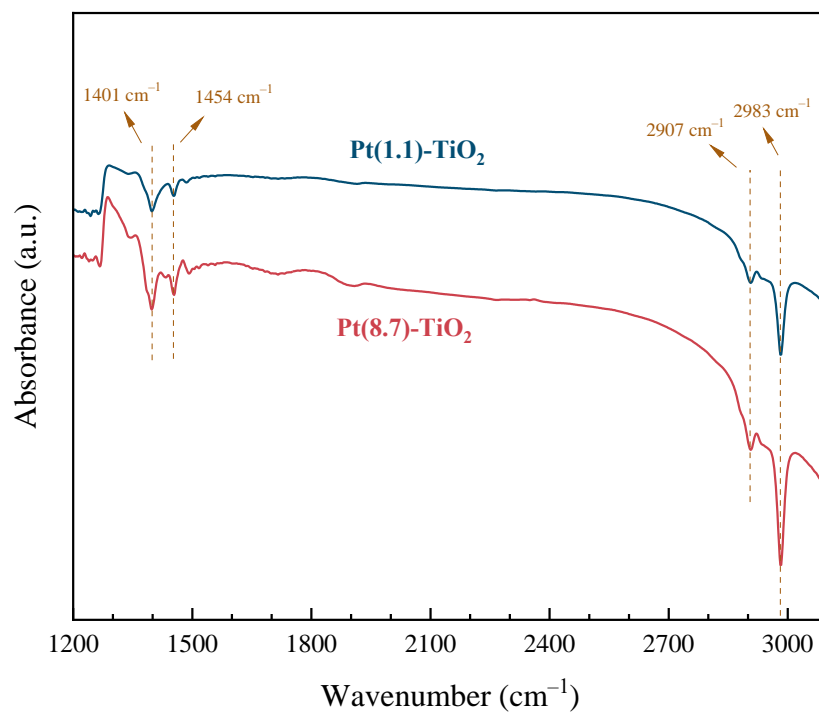

**Figure S2.** IR spectra of ethanol adsorption over Pt(1.1)-TiO<sub>2</sub> and Pt(8.7)-TiO<sub>2</sub> at 30 °C within air.

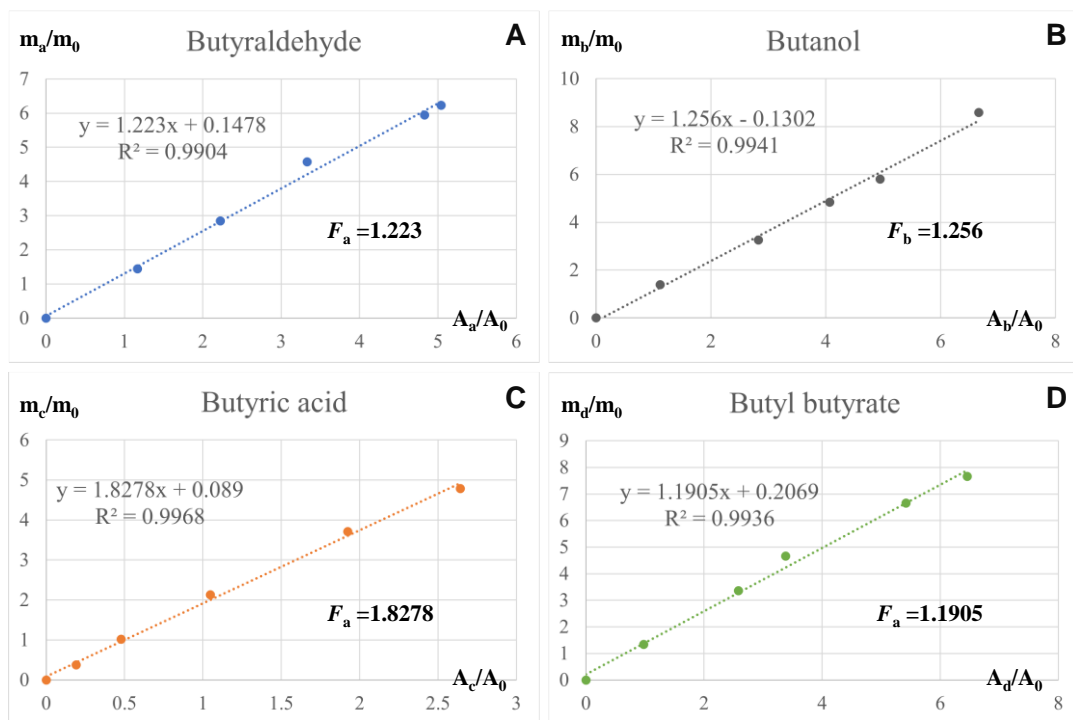

**Figure S3.** The GC calibration curves of butyraldehyde, butanol, butyric acid, and butyl butyrate.
